# Supplementary material for: Photo-thermal conversion ability of PEG and H2O-based microfluids of sodium lignosulfonate and its carbonized form
Source: Royal Society of Chemistry journal article supplement (doi:10.1039/d4ya00153b), 2024-01-01
Supplement: d4ya00153b1.pdf [file d4ya00153b1.pdf]

## Photo-Thermal Conversion Ability of PEG and H<sub>2</sub>O Based Microfluids of Sodium Lignosulfonate and Its Carbonized Form

Fatemeh Seifikar<sup>†</sup>, Saeid Azizian<sup>†\*</sup>, and Babak Jaleh<sup>‡</sup>

<sup>†</sup>Department of Physical Chemistry, Faculty of Chemistry, Bu-Ali Sina University, Hamedan, Iran

<sup>‡</sup>Department of Physics, Faculty of Science, Bu-Ali Sina University, Hamedan, Iran

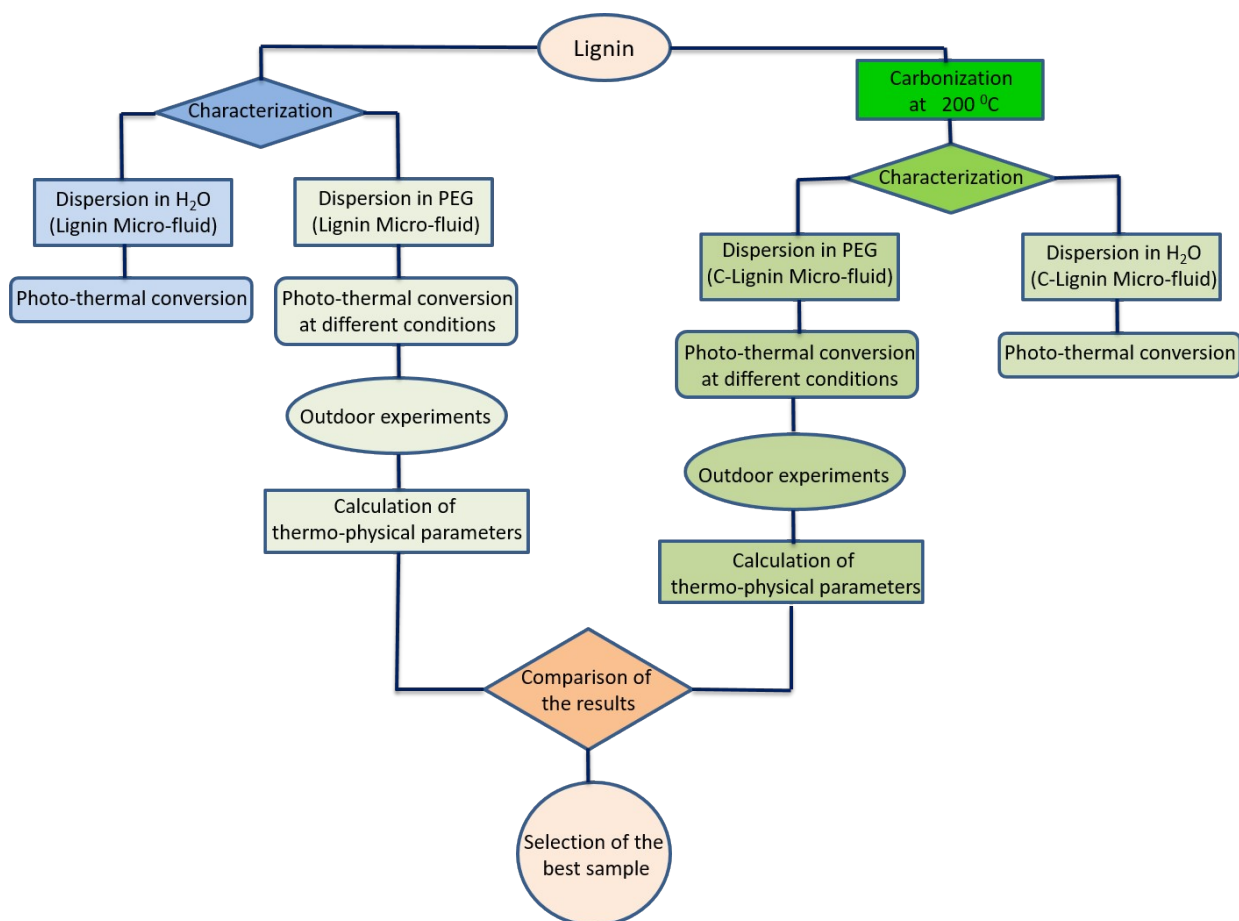

Fig. S1. The research flow chart of the present work.

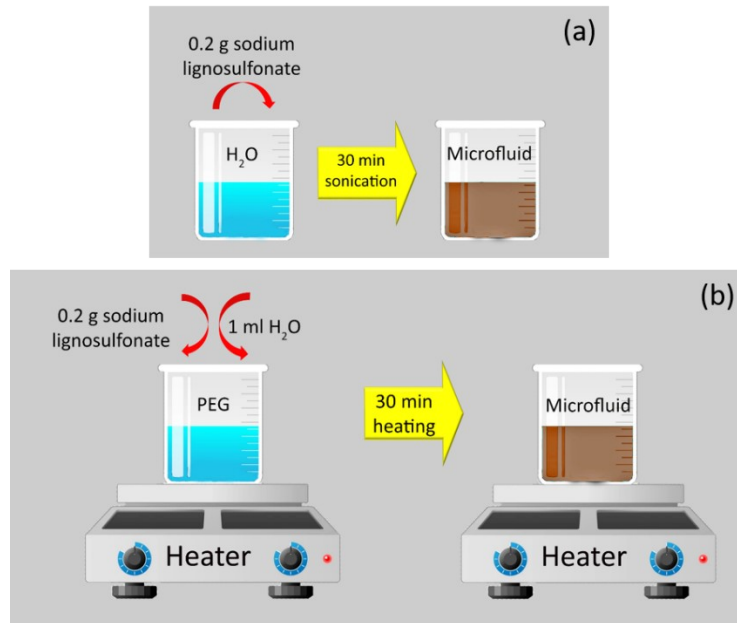

**Fig. S2.** The schematic of the used steps for preparation of (a) Lignin/H<sub>2</sub>O and (b) Lignin/PEG microfluids.

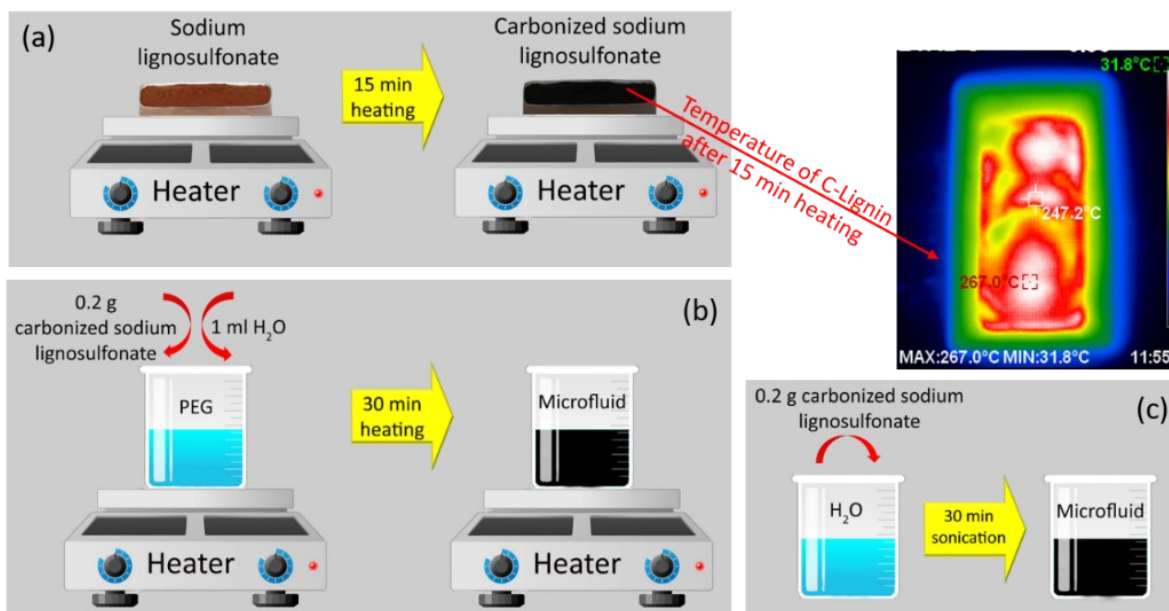

**Fig. S3.** The schematically representation of the preparation steps of (a) C-Lignin, (b) C-Lignin/H<sub>2</sub>O, and (c) C-Lignin/PEG microfluids.

(a)

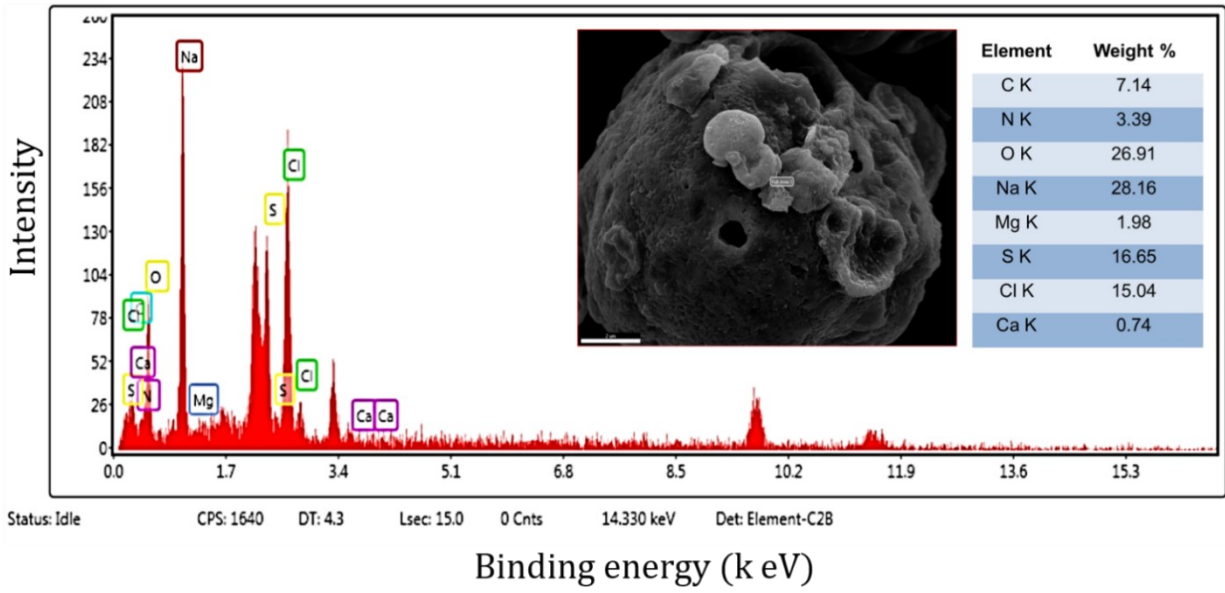

(b)

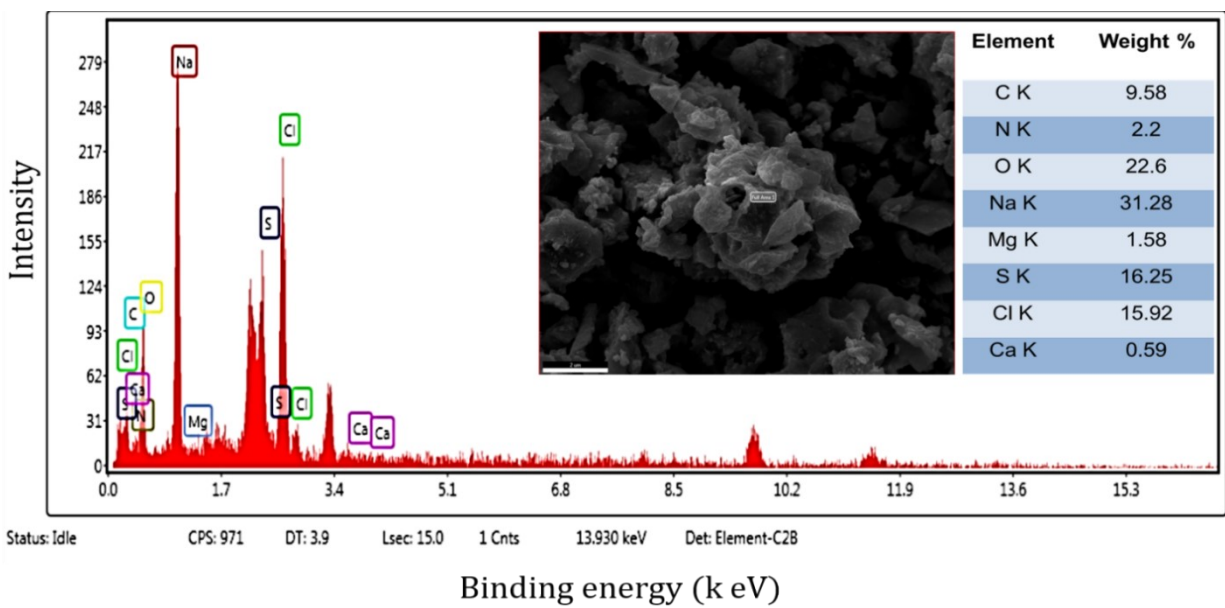

**Fig. S4.** EDX diagram of (a) Lignin and (b) C-Lignin.

(a)

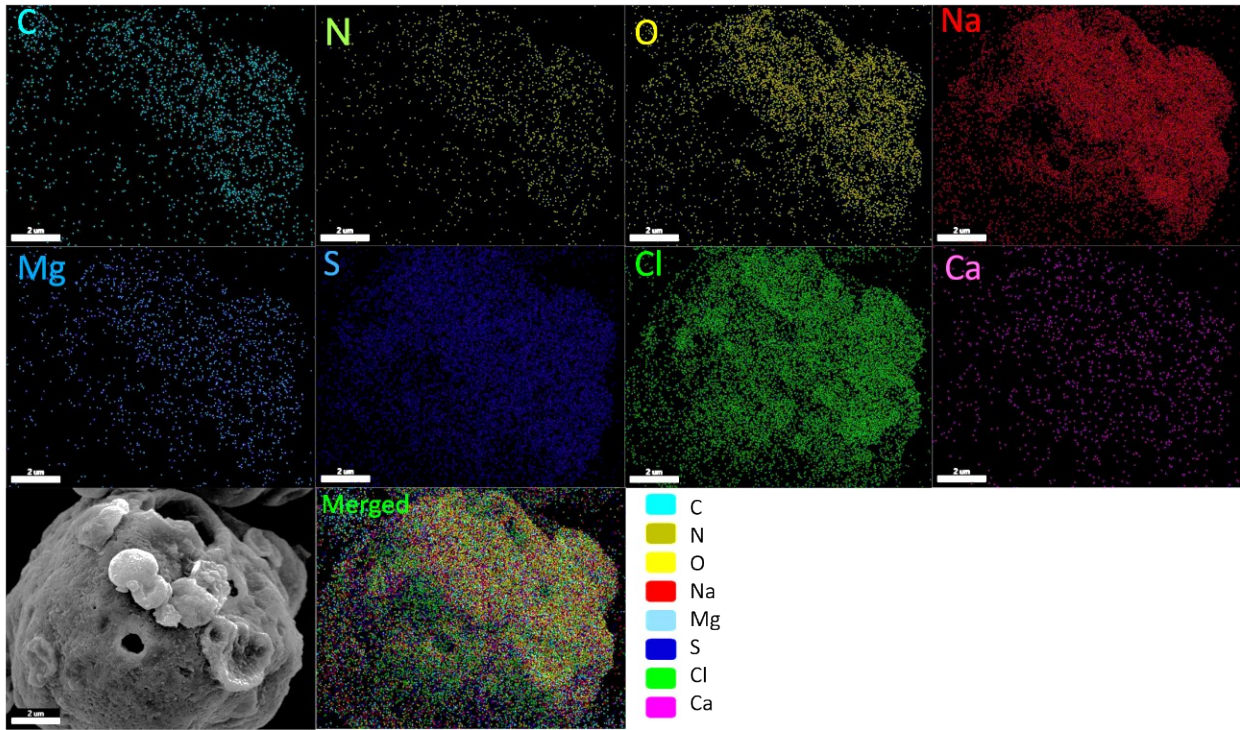

(b)

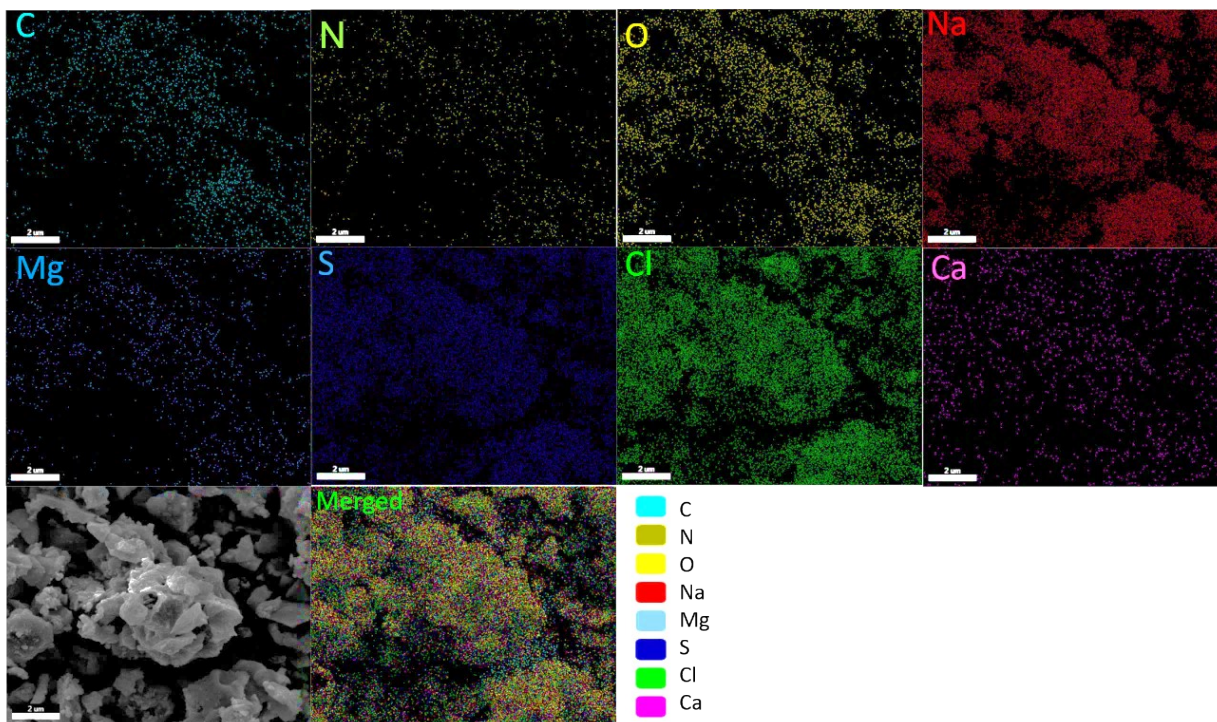

**Fig. S5.** Elemental map and corresponding SEM image of (a) Lignin and (b) C-Lignin.

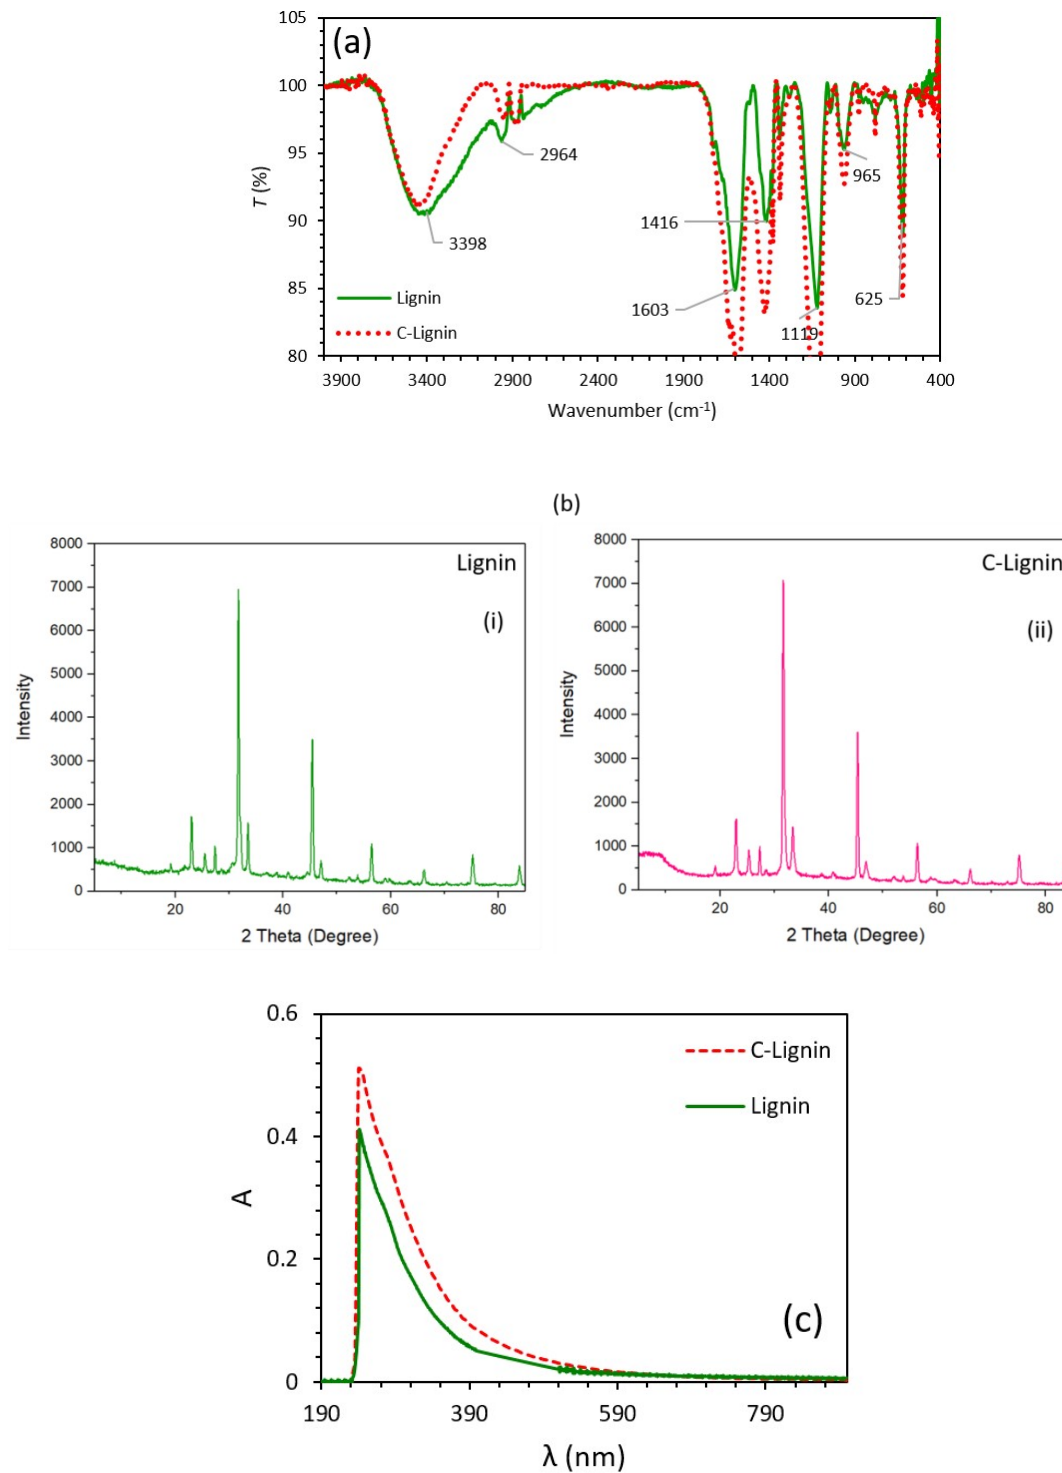

**Fig. S6.** (a) FT-IR spectra of Lignin and C-Lignin. (b) XRD spectrum of (i) Lignin and (ii) C-Lignin. (c) Absorption spectra of Lignin/PEG (diluted 83 times) and C-Lignin/PEG (diluted 20 times).

(a)

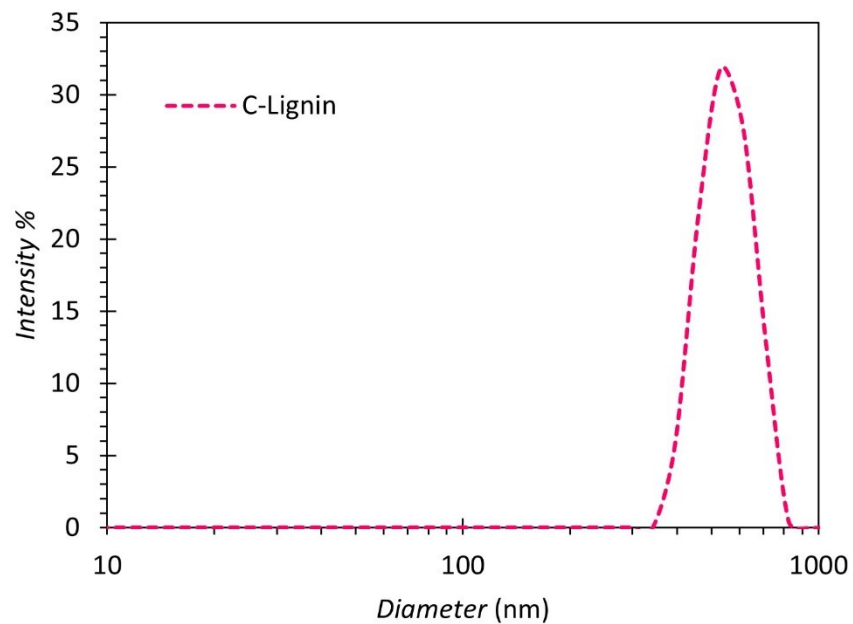

(b)

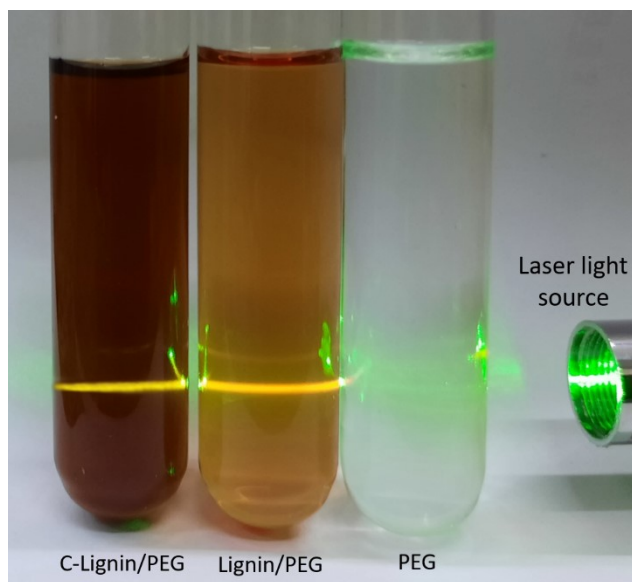

**Fig. S7.** (a) DLS histogram of the C-Lignin/PEG (diluted 10 times). (b) Path of the laser light in Lignin/PEG, C-Lignin/PEG, and PEG fluids.



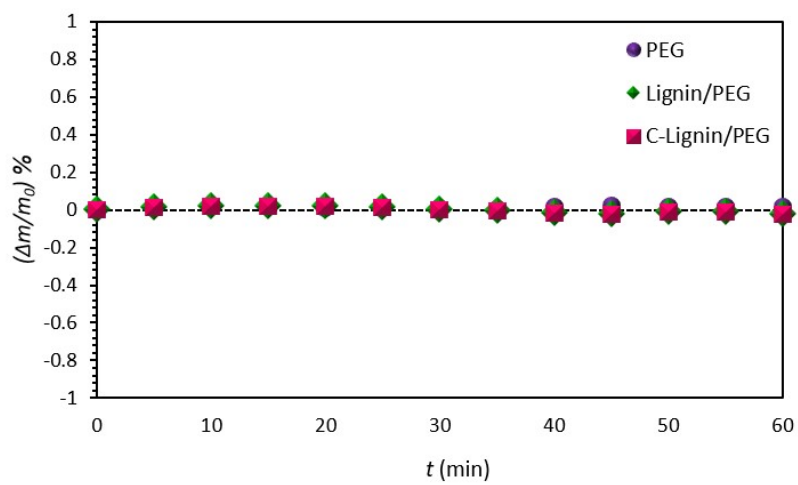

**Fig. S8.** Graph of  $\left(\frac{\Delta m}{m_0}\right) \%$  of synthesized MFs and PEG vs. time during 60 min light irradiation.

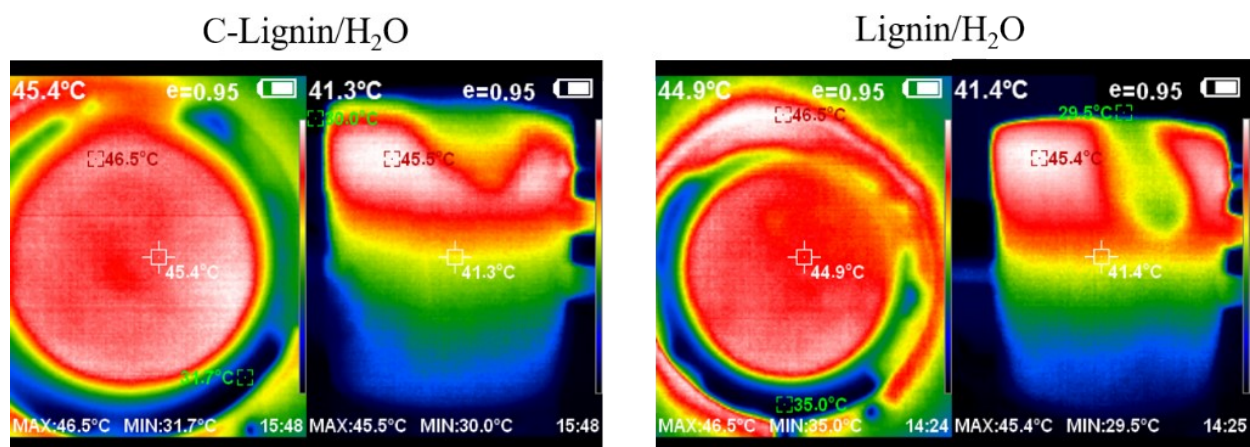

**Fig. S9.** The corresponding IR images from different views of Lignin/H<sub>2</sub>O and C-Lignin/H<sub>2</sub>O fluids.

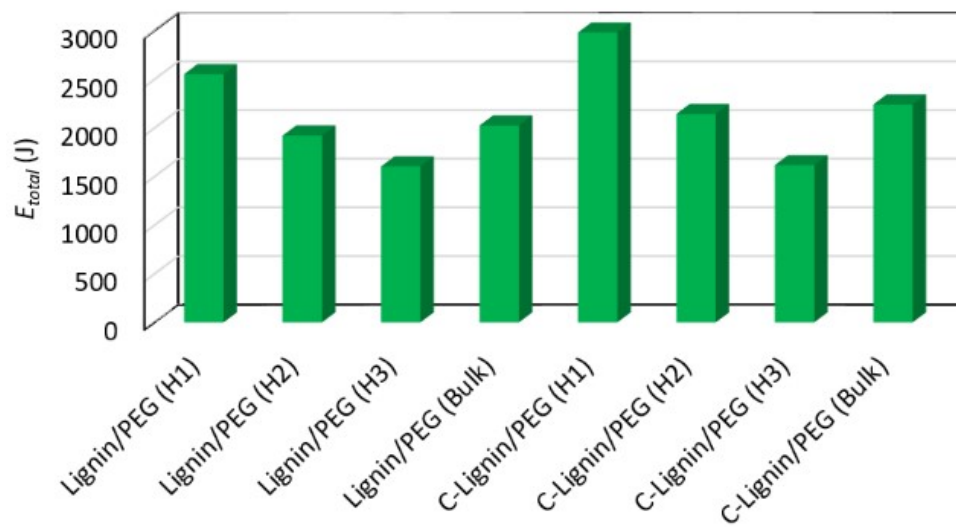

**Fig. S10.** Graphs of total stored energy for Lignin/PEG and C-Lignin/PEG MFs at different heights from the surface.

**Table S1.** The constants  $A$  and  $B$  obtained from fitting the experimental data of the heating and cooling stages of samples.

| Height              | $A$ ( $^{\circ}\text{C}/\text{s}$ ) | $B$ ( $\text{s}^{-1}$ ) | $R^2$        |
|---------------------|-------------------------------------|-------------------------|--------------|
| <b>H1 (Heating)</b> | 0.0156                              | 0.00062                 | 0.99224<br>3 |
| <b>H2 (Heating)</b> | 0.0073                              | 0.00020                 | 0.99942<br>7 |
| <b>H3 (Heating)</b> | 0.0046                              | 0.00005                 | 0.99957<br>5 |
| <b>Bulk</b>         | 0.0092                              | 0.00029                 | -            |
| <b>H1 (Cooling)</b> | -                                   | 0.00044                 | 0.90312<br>2 |
| <b>H2 (Cooling)</b> | -                                   | 0.00023                 | 0.99045<br>6 |
| <b>H3 (Cooling)</b> | -                                   | 0.00011                 | 0.89973<br>3 |
| <b>Bulk</b>         | -                                   | 0.00026                 | -            |
